# Supplementary material for: Lactobacillus plantarum DR7 Modulated Bowel Movement and Gut Microbiota Associated with Dopamine and Serotonin Pathways in Stressed Adults
Source: MDPI journal article supplement (doi:10.3390/ijms21134608), 2020-06-29
Supplement: s1 [file s1]

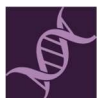

Article

# ***Lactobacillus plantarum* DR7 Modulated Bowel Movement and Gut Microbiota Associated with Dopamine and Serotonin Pathways in Stressed Adults**

Guoxia Liu <sup>1</sup>, Hui-Xian Chong <sup>2</sup>, Fiona Yi-Li Chung <sup>2</sup>, Yin Li <sup>1,\*</sup> and Min-Tze Liong <sup>2,\*</sup>

<sup>1</sup> CAS Key Laboratory of Microbial Physiological and Metabolic Engineering, State Key Laboratory of Microbial Resources, Institute of Microbiology, Chinese Academy of Sciences, Beijing 100101, China; liuguoxia@im.ac.cn

<sup>2</sup> School of Industrial Technology, Universiti Sains Malaysia, Penang 11800, Malaysia; [huixian1126@gmail.com](mailto:huixian1126@gmail.com) (H.-X.C.); [fionacyl@outlook.com](mailto:fionacyl@outlook.com) (F.Y.-L.C.)

\* Correspondence: [yli@im.ac.cn](mailto:yli@im.ac.cn) (Y.L.); [mintze.liong@usm.my](mailto:mintze.liong@usm.my) (M.-T.L.); Tel.: +86-10-6480-7485 (Y.L.); +604-653-2114 (M.-T.L.); Fax: +86-10-6480-7468 (Y.L.); +604-653-6375 (M.-T.L.)

**Acknowledgments:** Prebiotics were obtained via courtesy of Aqurate Ingredients Intl., Kuala Lumpur, Malaysia, while DR7 was obtained via courtesy of Clinical Nutrition, Kuala Lumpur, Malaysia. Clinical Nutrition was the approved Industrial Sponsor. Authors thank Dr Jordi Espadaler Mazo for assisting in microbiota and statistical analyses, and comprehensively reading and improving the writeup of the manuscript. Authors also thank the funder for providing ideas in the stages of designing the experiments and reading the manuscript for intellectual content prior to submission as per decisions of authors.

An error has occurred in the section of Acknowledgement list above. The sentence "Clinical Nutrition was the approved Industrial Sponsor" is replaced by "This project is supported by Clinical Nutrition and CoEBio of CAS-TWAS (Centre of Excellence for Biotechnology, Chinese Academy of Sciences-The Third World Academy of Sciences)."
